# Supplementary material
Source: publisher figshare collection journal article supplement (https://geolsoc.figshare.com/articles/dataset/_/3453620)
Supplement: Supplementary file 12 [file 1]

**% Cumulative Probability Plot  
Original Data**

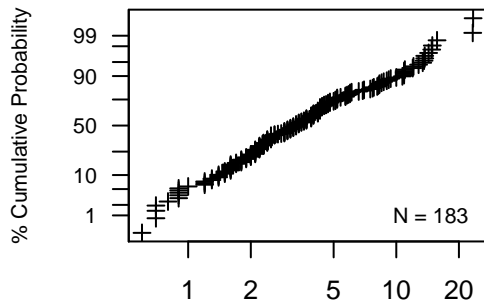

As (mg/kg) in 0-5 cm <2 mm soil

**% Cumulative Probability Plot  
Gridded Data**

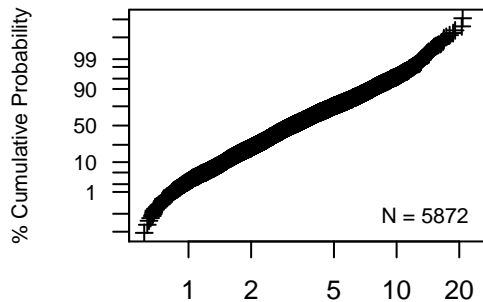

As (mg/kg) in 0-5 cm <2 mm soil

**As (mg/kg) in 0-5 cm <2 mm soil**

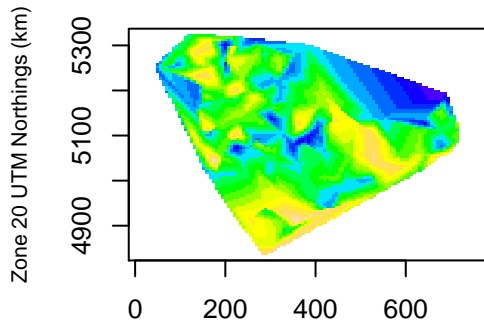

Zone 20 UTM Eastings (km)

**Concentration-Area Plot**

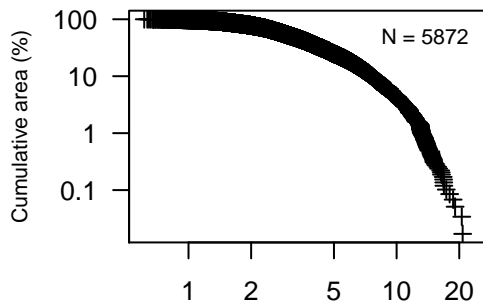

As (mg/kg) in 0-5 cm <2 mm soil
