# Supplementary material
Source: publisher figshare collection journal article supplement (https://geolsoc.figshare.com/articles/dataset/_/3453620)

**Histogram**

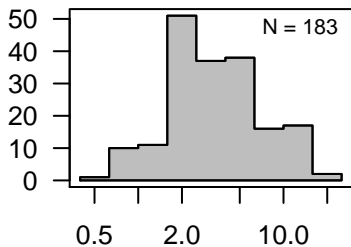

**Tukey Boxplot**

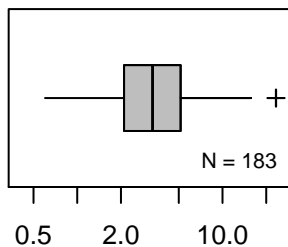

**Empirical Cumulative Distribution Function (ECDF)**

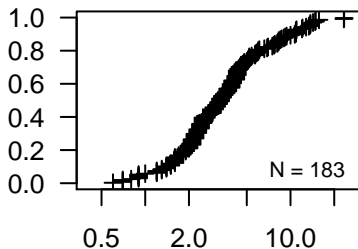

**% Cumulative Percentage (Normal) Probability (CPP) Plot**

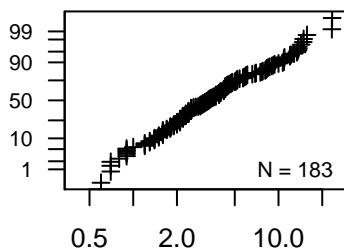

Supplement: Supplementary file 13 [file 1]
