# Supplementary material
Source: publisher figshare collection journal article supplement (https://geolsoc.figshare.com/articles/dataset/_/3453620)

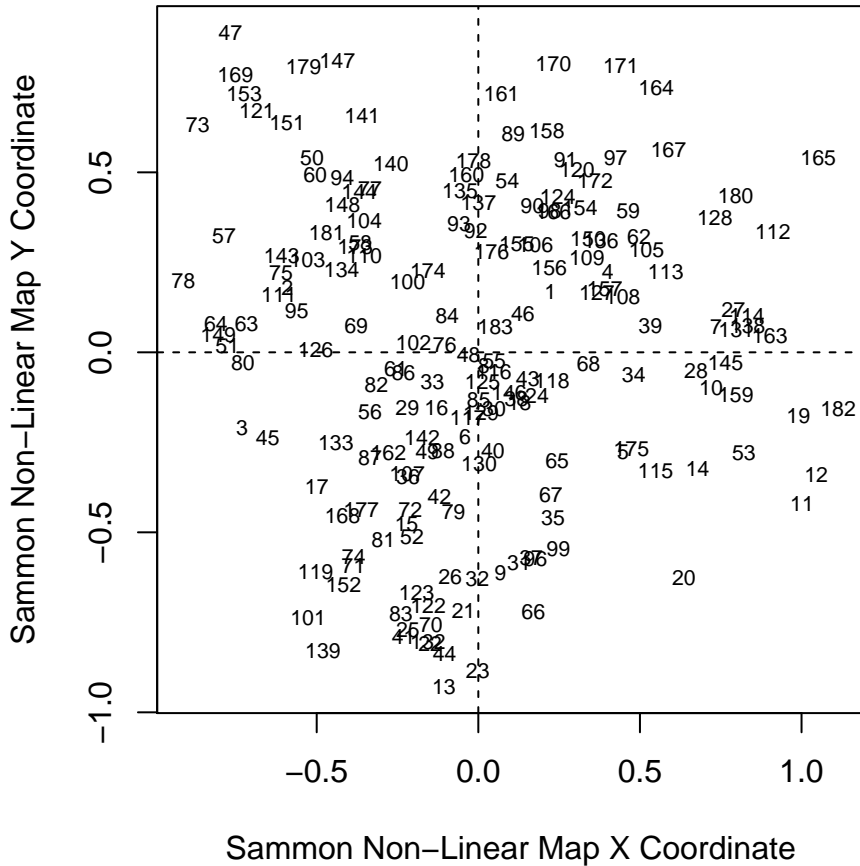

Supplement: Supplementary file 1 [file 1]

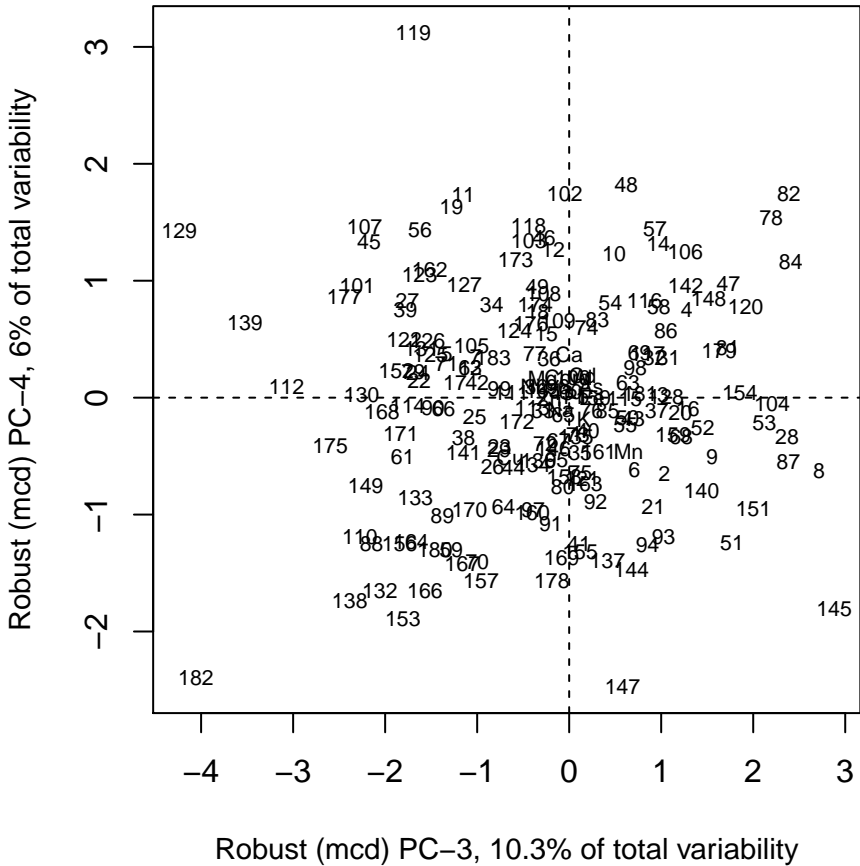

Supplement: Supplementary file 2 [file 1]

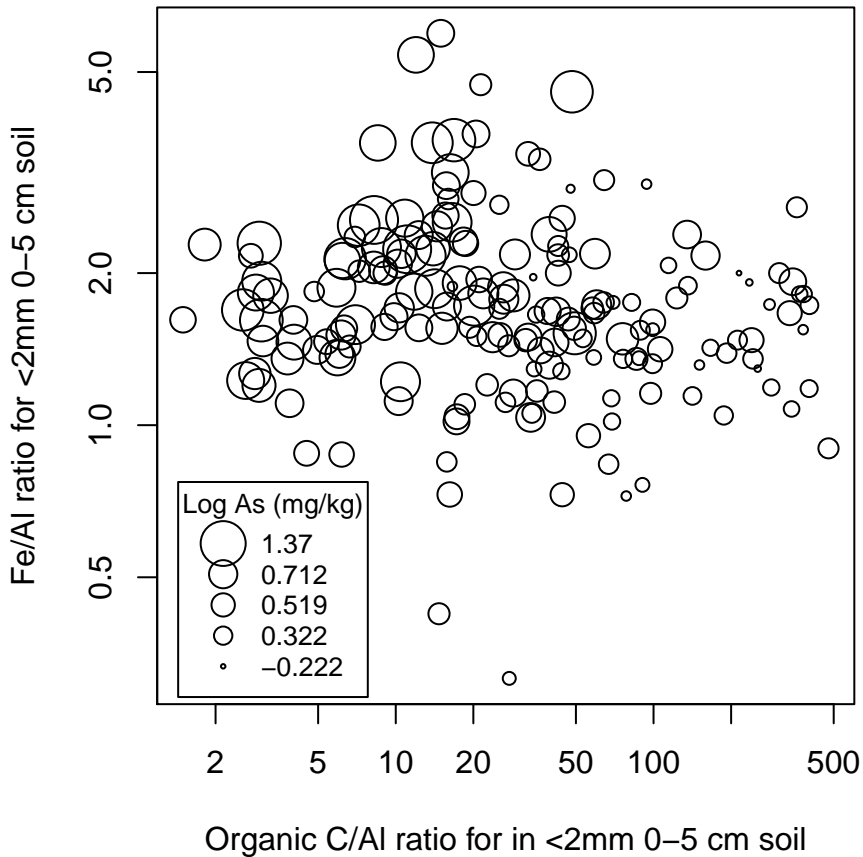

Supplement: Supplementary file 3 [file 1]

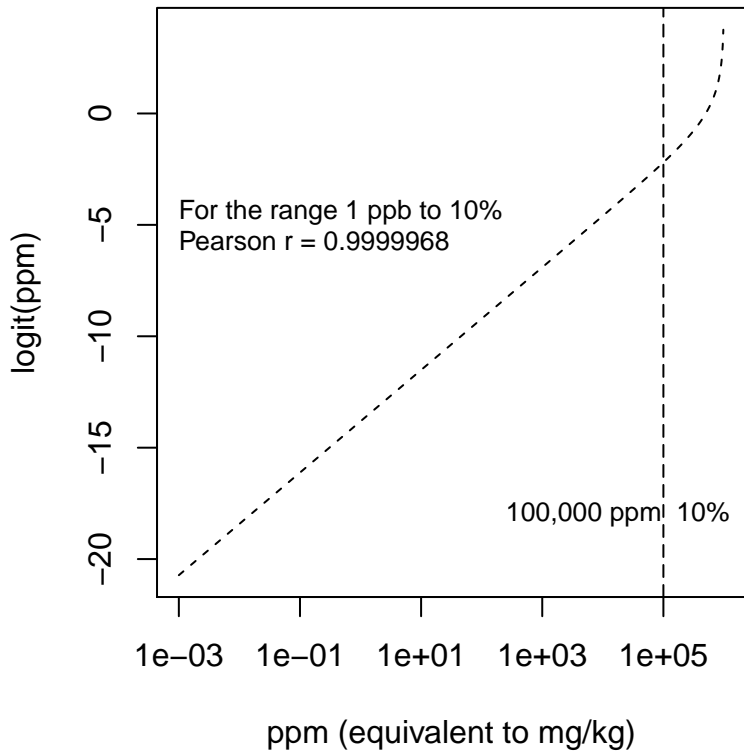

Supplement: Supplementary file 4 [file 1]

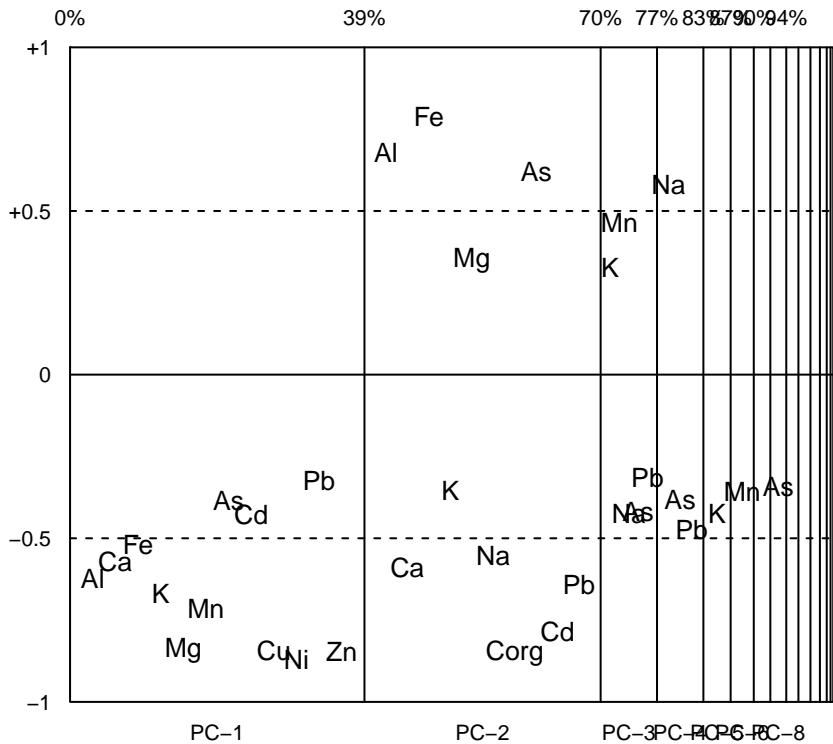

Supplement: Supplementary file 5 [file 1]

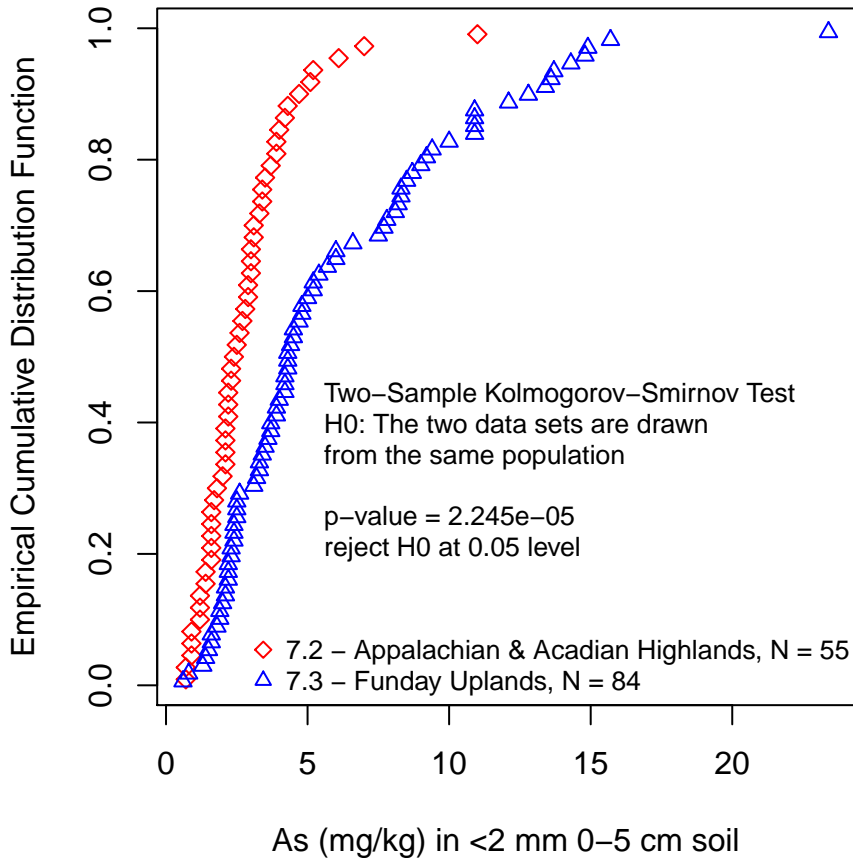

Supplement: Supplementary file 7 [file 1]

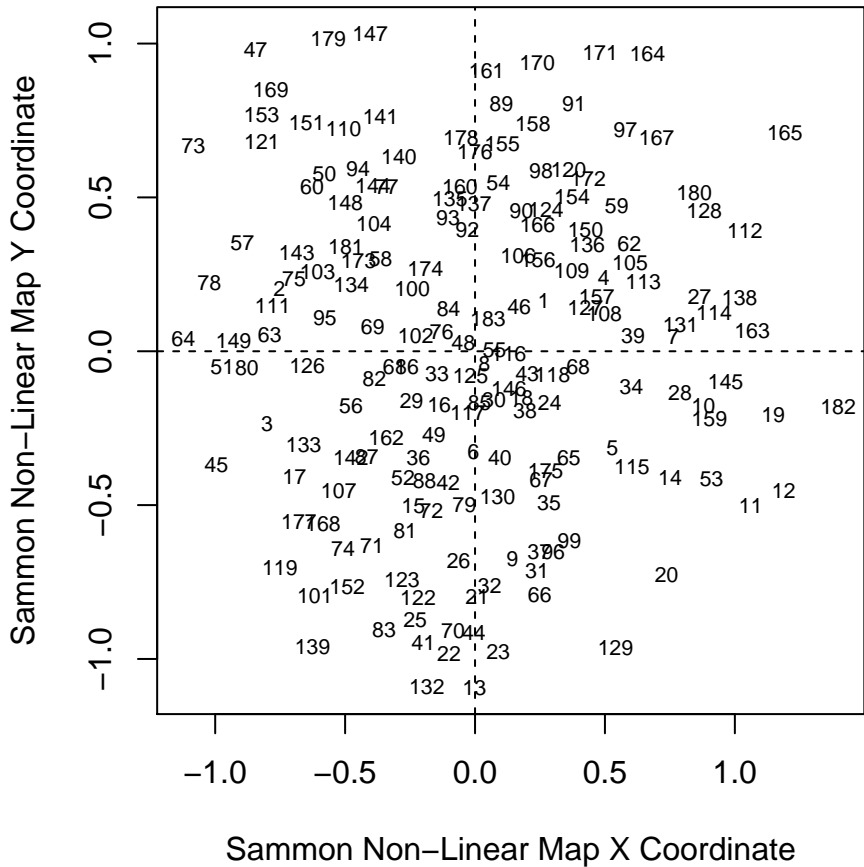

Supplement: Supplementary file 8 [file 1]

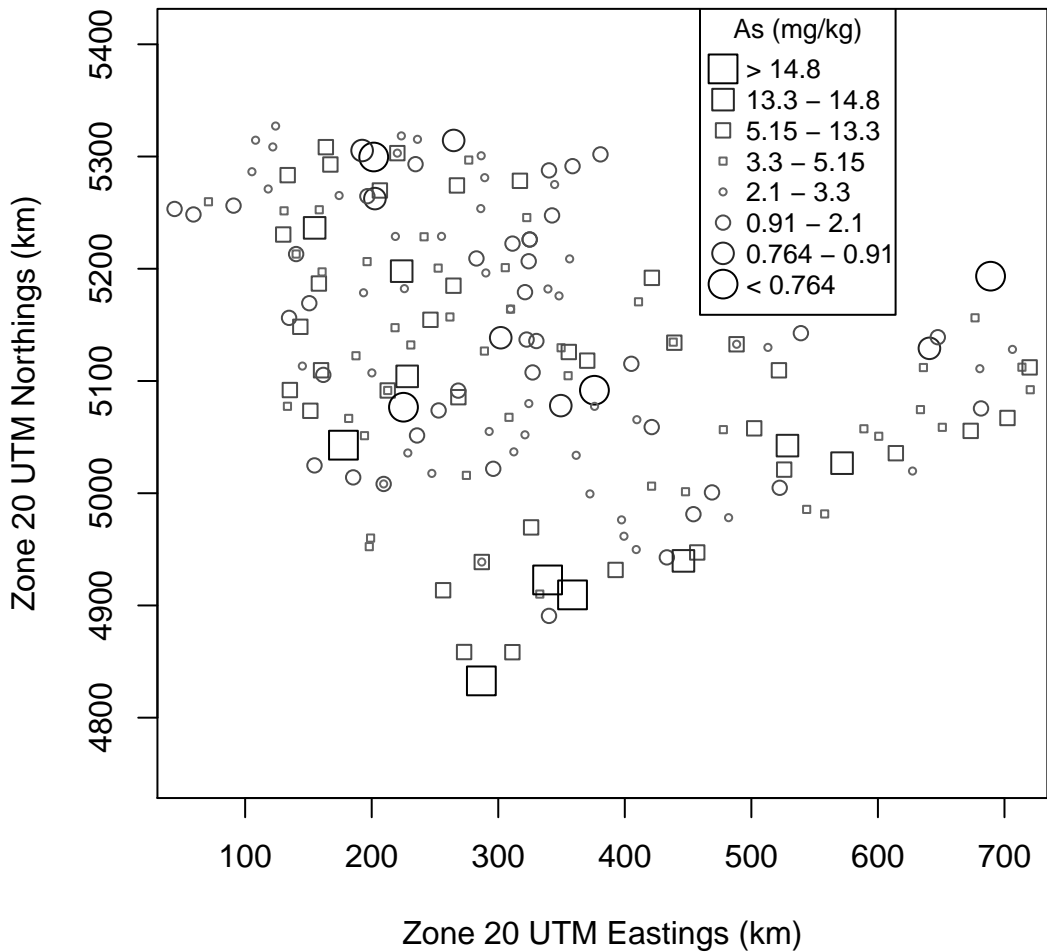

Supplement: Supplementary file 9 [file 1]

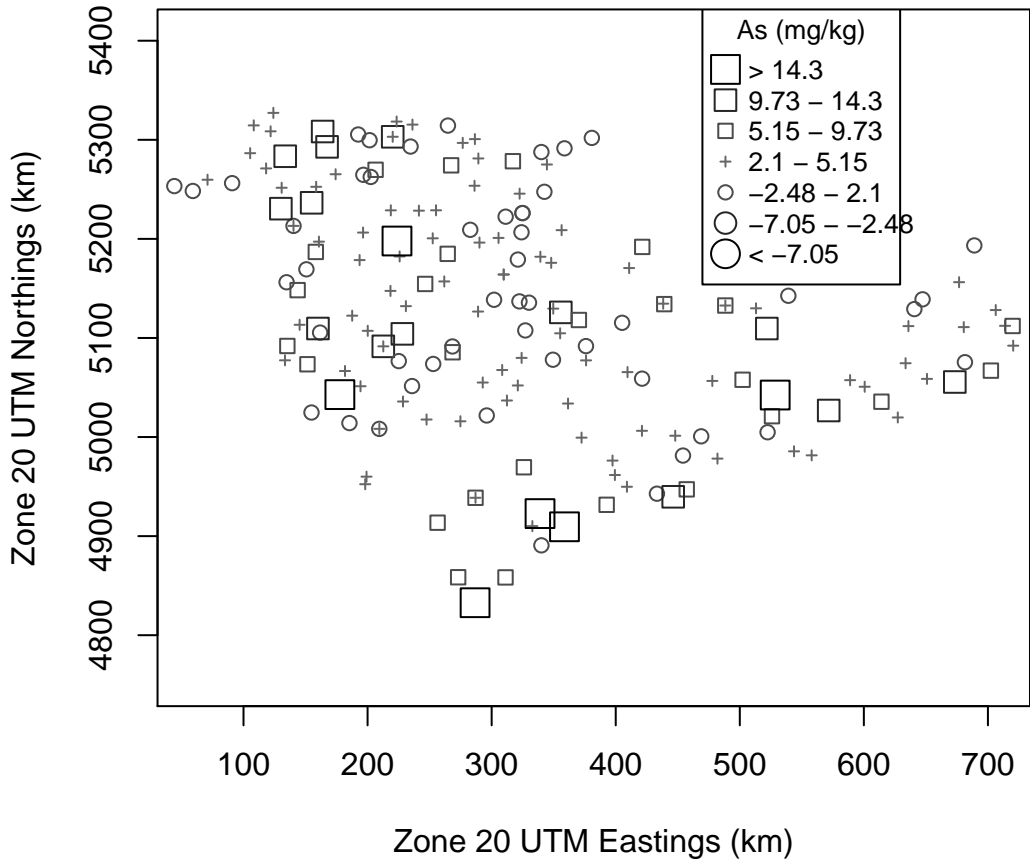

Supplement: Supplementary file 10 [file 1]

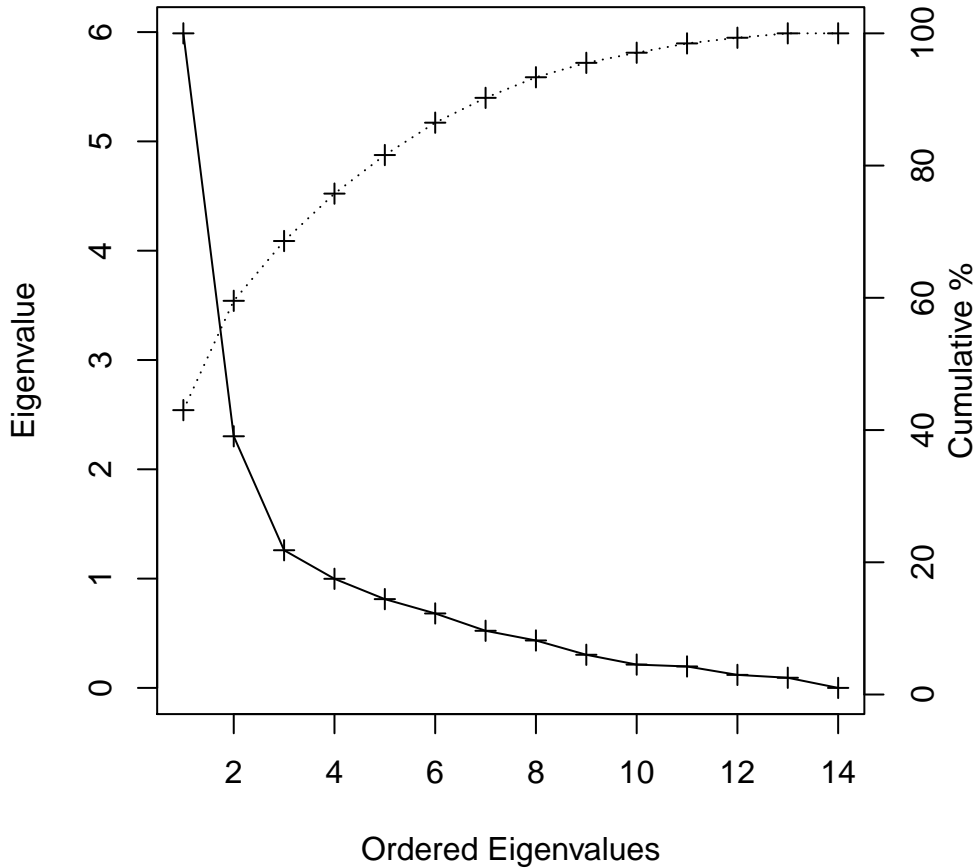

Supplement: Supplementary file 11 [file 1]

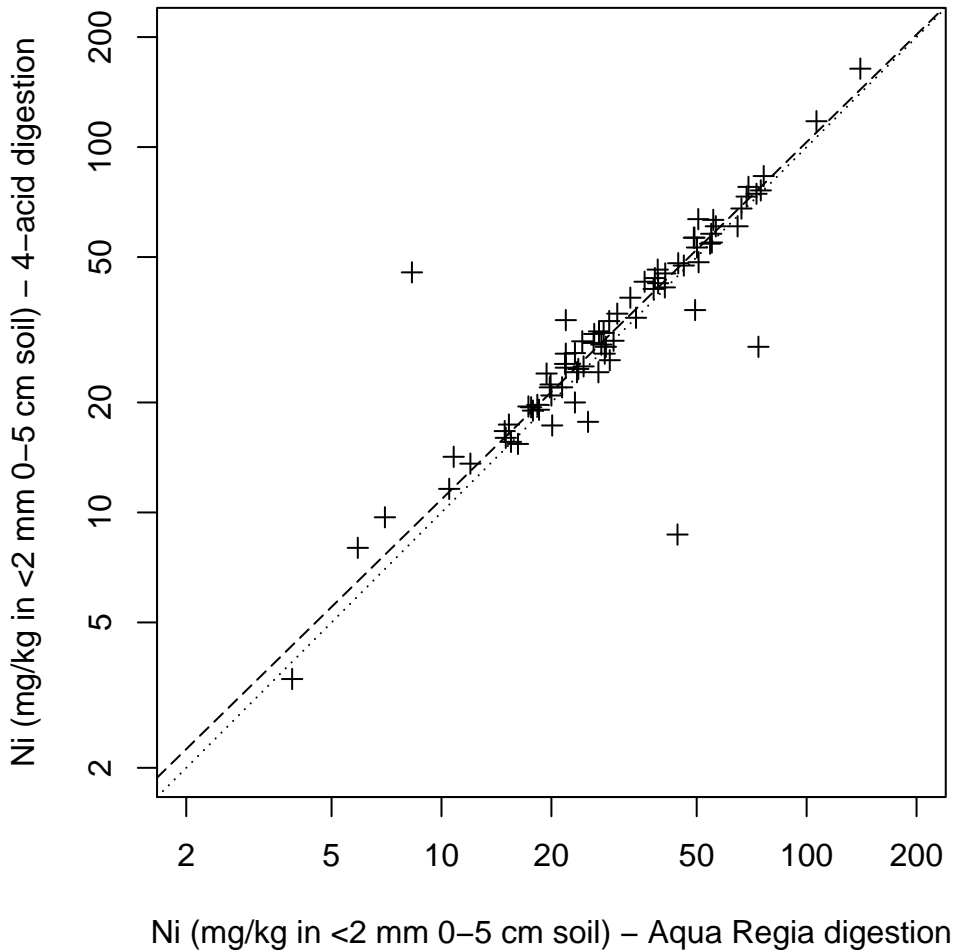

Supplement: Supplementary file 14 [file 1]

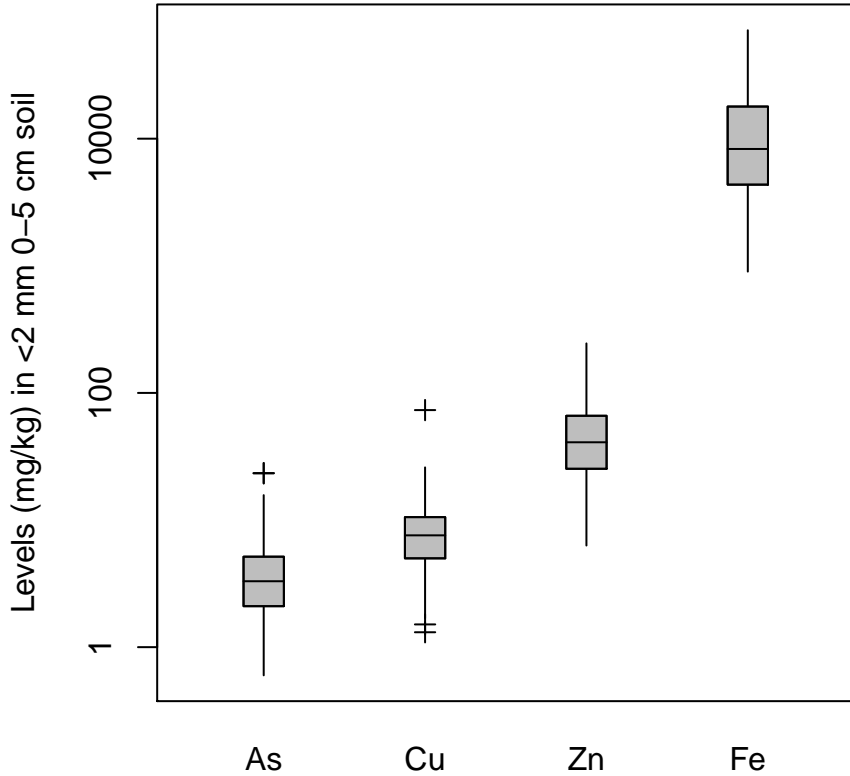

Supplement: Supplementary file 15 [file 1]

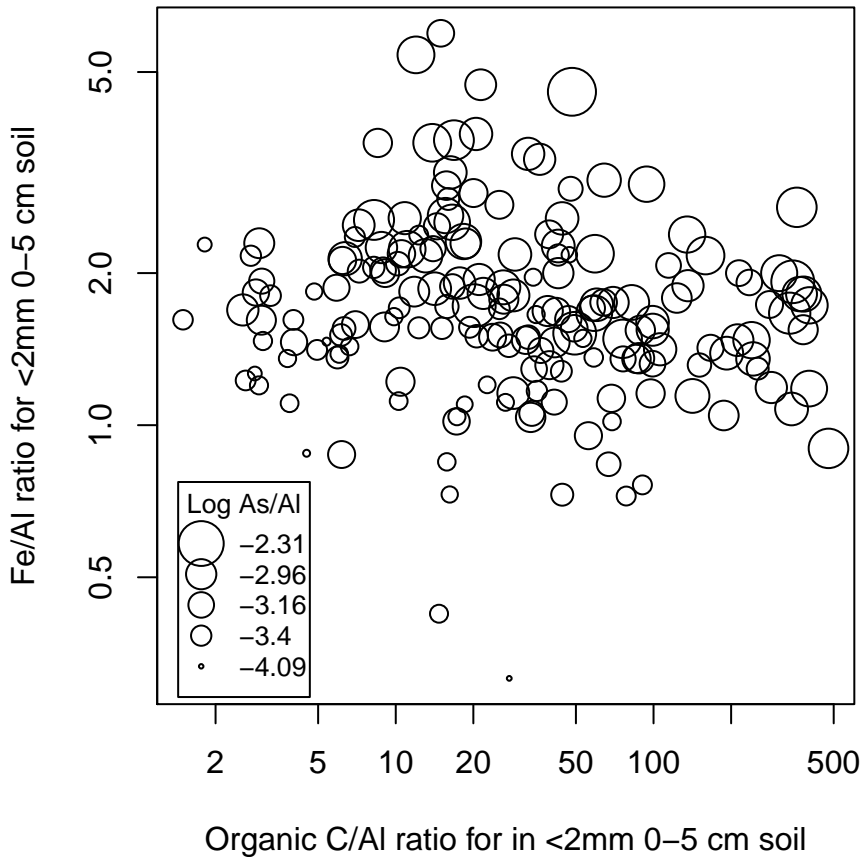

Supplement: Supplementary file 16 [file 1]

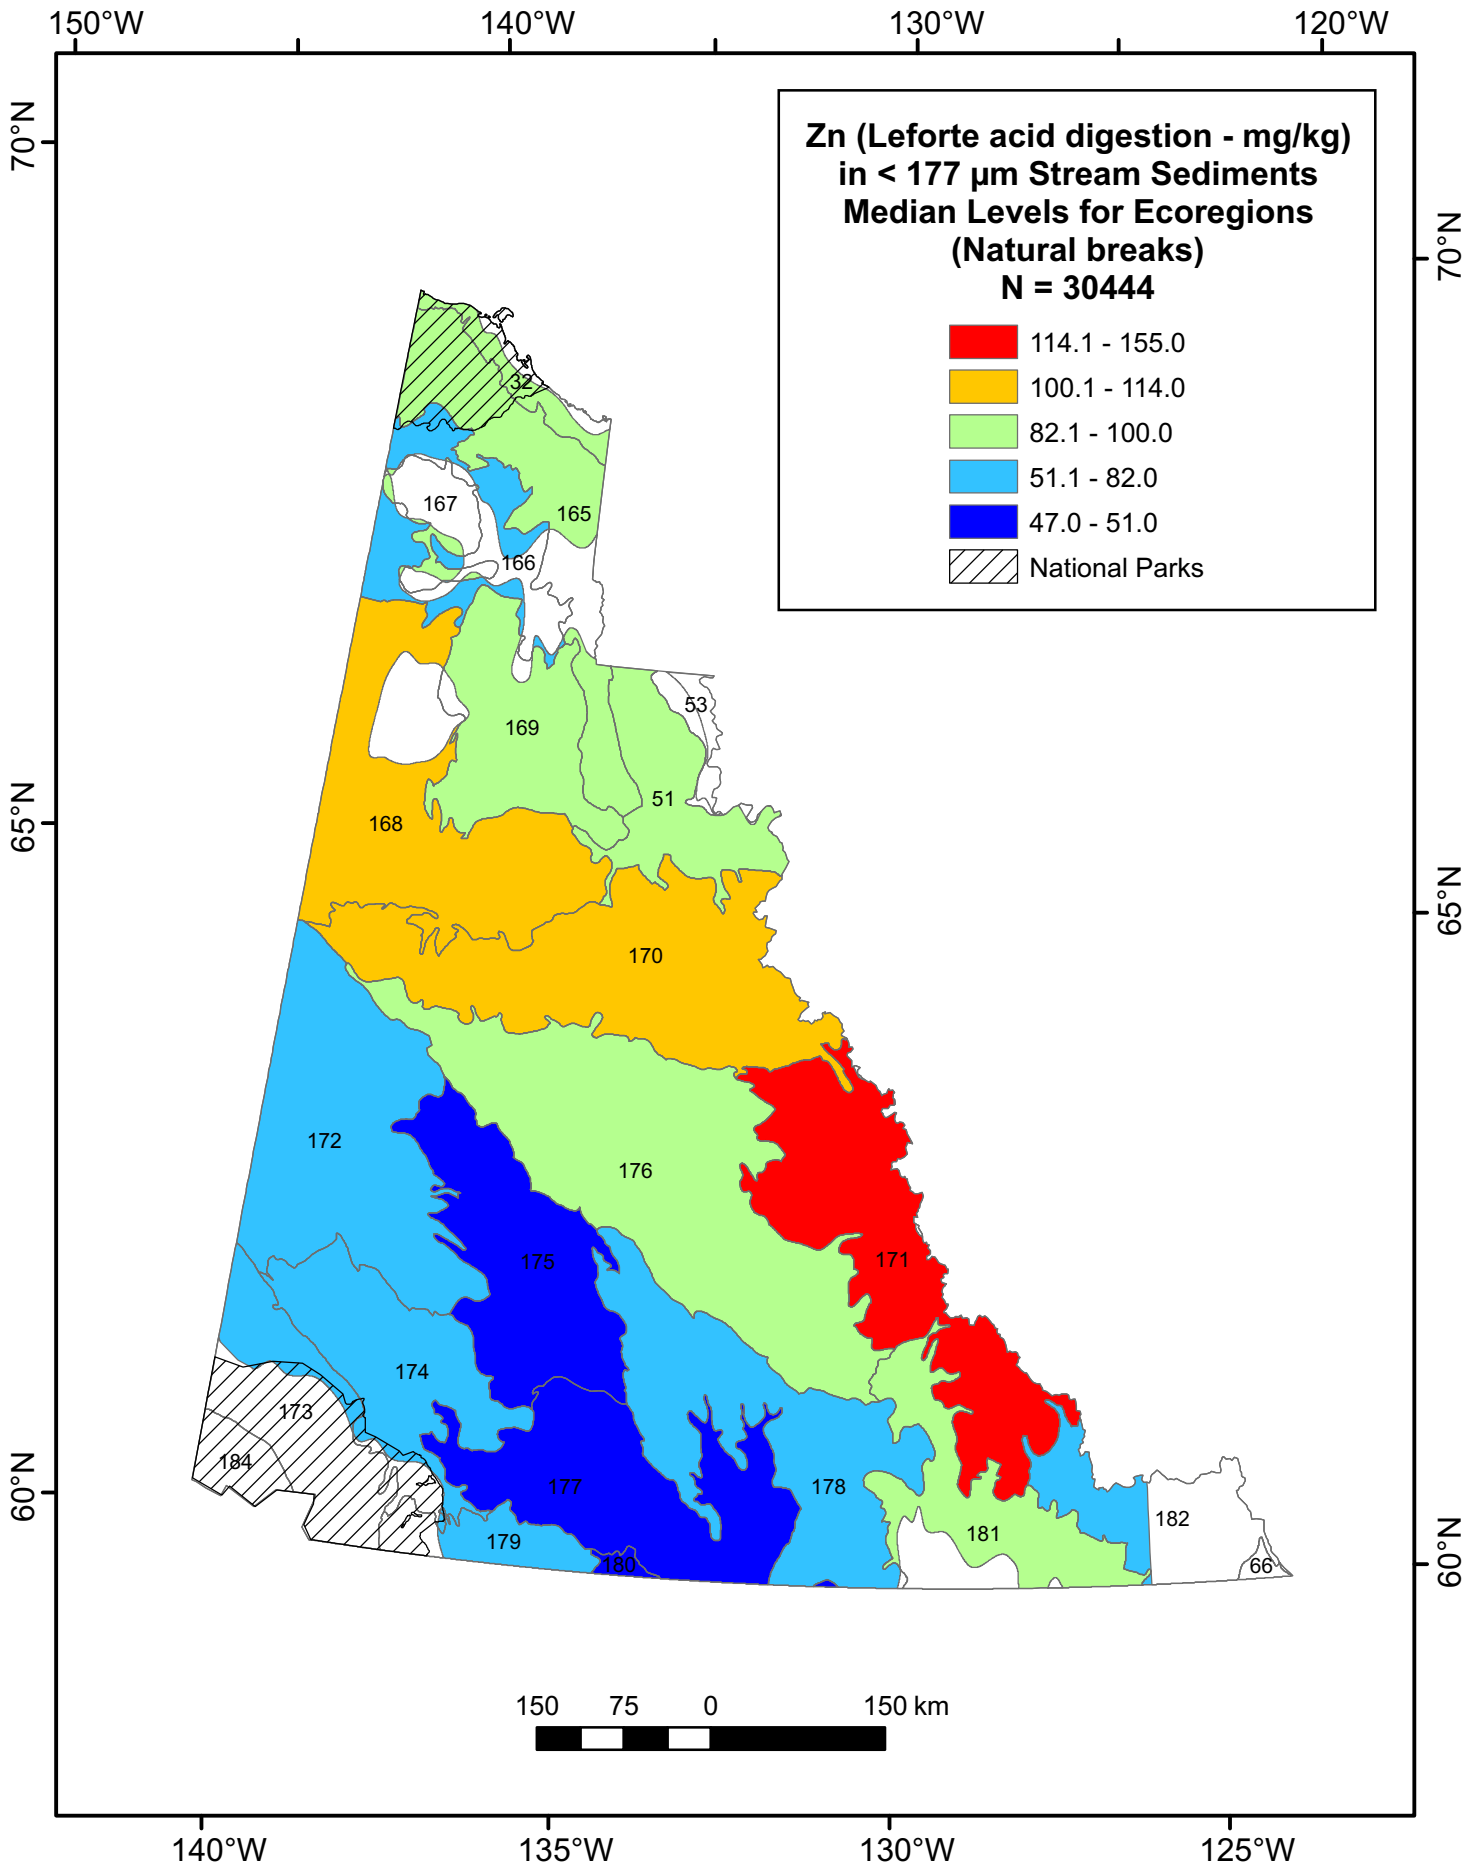

Supplement: Supplementary file 17 [file 1]

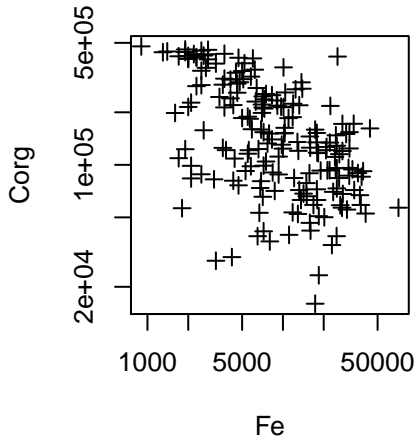

**Tukey Boxplot**

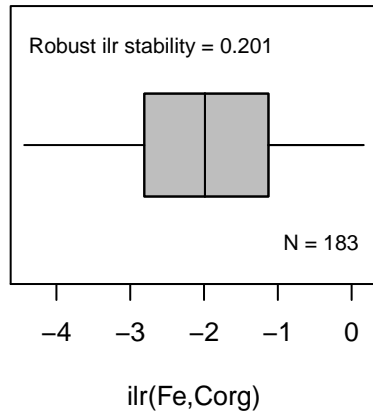

**Index Plot**

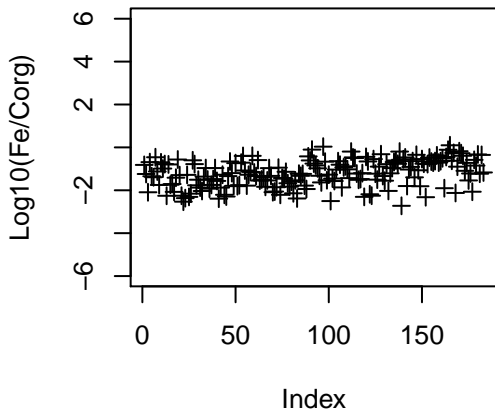

**Empirical Cumulative Distribution Function (ECDF)**

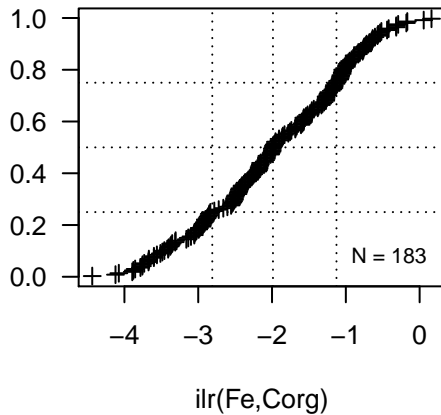

Supplement: Supplementary file 18 [file 1]
